# Supplementary material for: Protective effect of hepatocyte-enriched lncRNA-Mir122hg by promoting hepatocyte proliferation in acute liver injury
Source: Springer Nature journal article supplement (doi:10.1038/s12276-022-00881-2), 2022-11-24
Supplement: MOESM1 [file 12276_2022_881_MOESM1_ESM.pdf]

# Supplementary Figures:

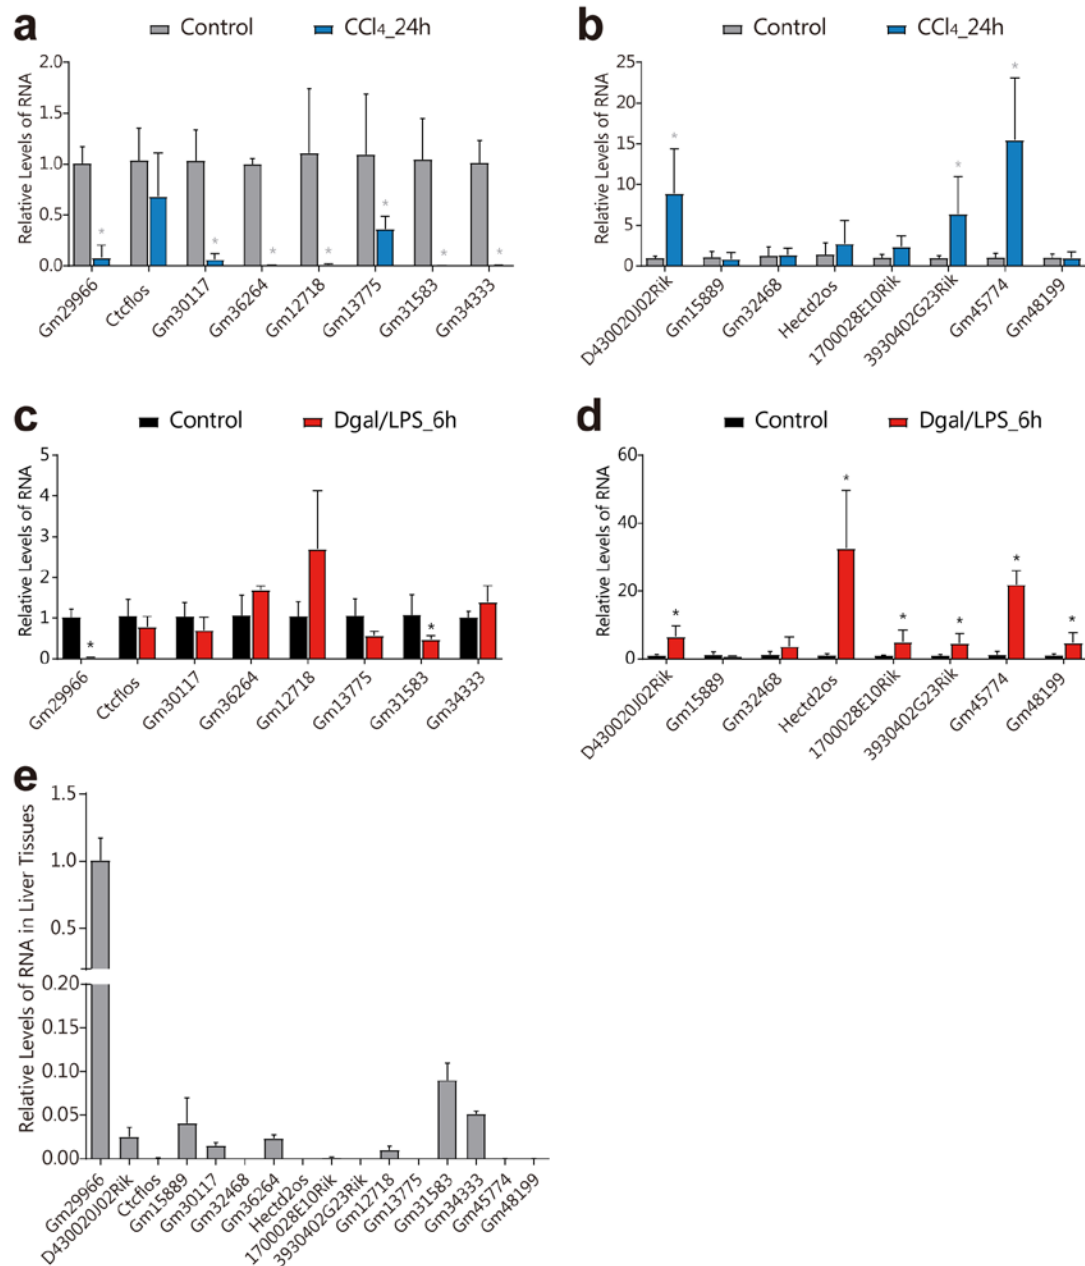

Supplementary Fig. 1: a-d, In the CCl<sub>4</sub>-induced model, mice (n=8 per group) were executed at 6h, 12h, 24h, 48h, 96h and 8d after injection of CCl<sub>4</sub>; and in the Dgal/LPS-induced model, mice (n=8 per group) were executed at 2h, 4h and 6h after injection of Dgal/LPS; for the pre-experiment, the expression levels of 16 lncRNAs in liver tissues were detected in the control group, the CCl<sub>4</sub>-24h group, and the Dgal/LPS-6h group. e, Comparative analysis of 16 lncRNAs expressions in normal liver tissues were performed. The data were shown as the mean±SD for at least triplicate experiments. \*p < 0.05 for vs Control.

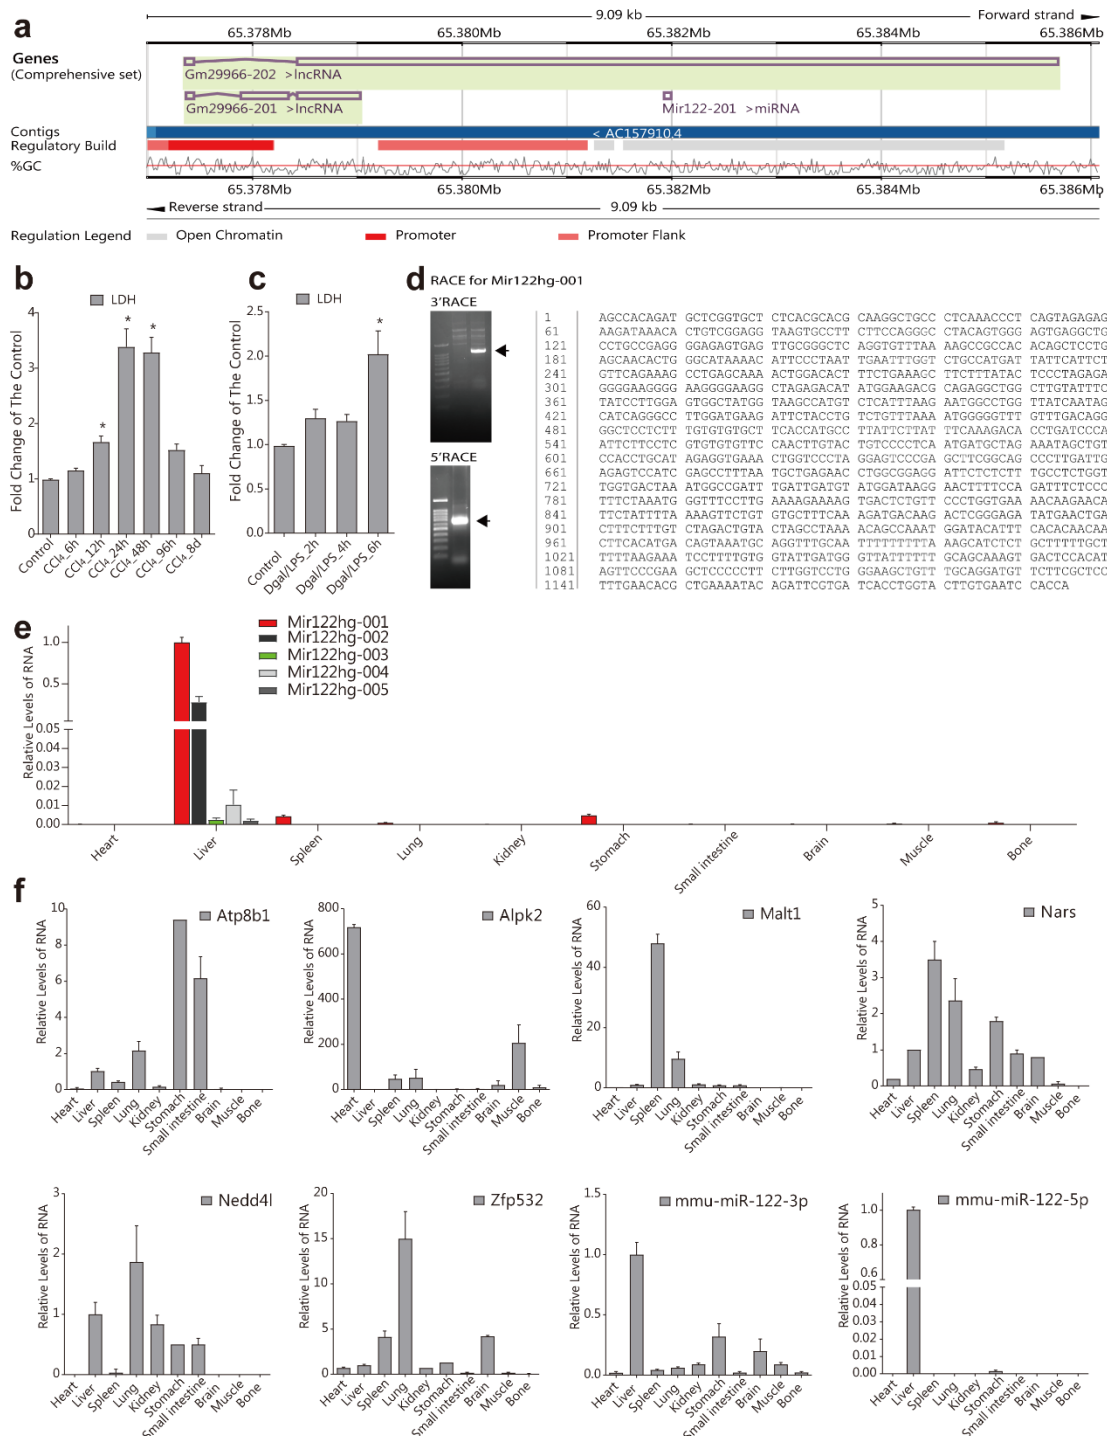

Supplementary Fig. 2: a, Sequence search and genome-wide localization in the Ensembl database revealed that the putative *Gm29966* is an intergenic lncRNA with two transcripts, 001 and 002, and transcript 002 covers the full length of *miR122*. b-c, In the CCl<sub>4</sub>-induced model, mice (n=8 per group) were executed at 6h, 12h, 24h, 48h, 96h and 8d after injection of CCl<sub>4</sub>; and in the Dgal/LPS-induced model, mice (n=8 per group) were executed at 2h, 4h and 6h after injection of Dgal/LPS, and serum LDH levels were detected, respectively. d, Exact sequences of *Mir122hg* transcripts with or without PolyA tail at the 3' end were identified by 3' RACE, respectively, and the sequences of *Mir122hg* transcripts at the 5' end was identified by 5' RACE, and the full length of *Mir122hg-001* was obtained after splicing. e-f, Comparative expression of *Mir122hg*, *miR122* and upstream and

downstream neighboring genes in 10 tissues of mice (n=8) were detected by qPCR. The data were shown as the mean±SD for at least triplicate experiments. \*p <0.05 for vs Control.

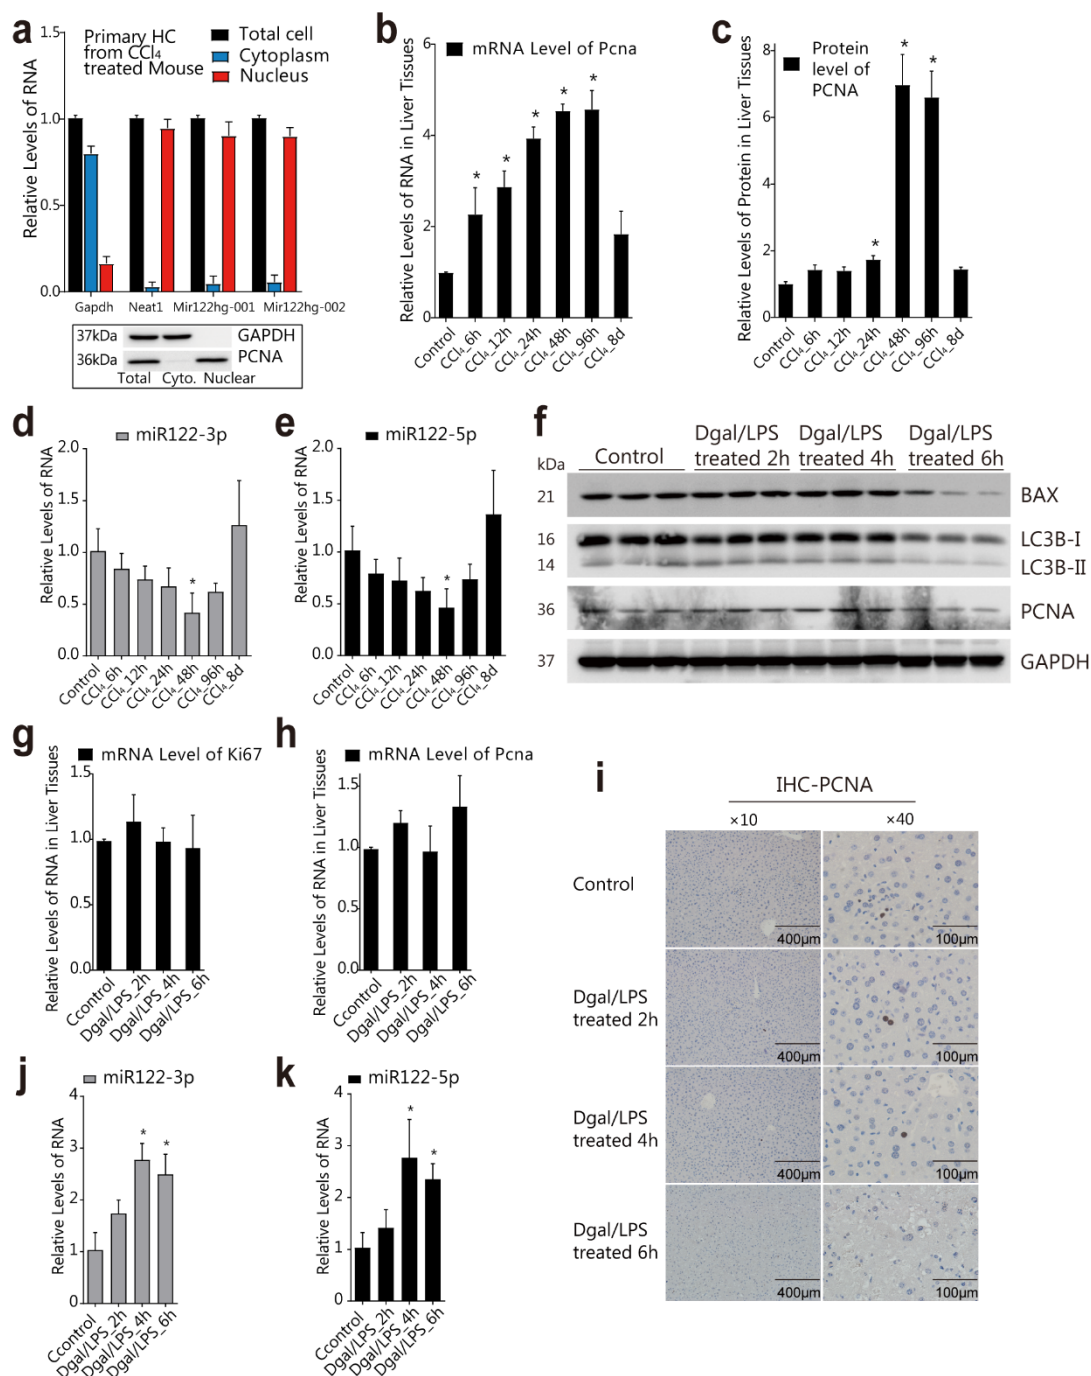

Supplementary Fig. 3: a, Mice were executed at 24h after CCl<sub>4</sub> injection, and primary HCs were extracted for nuclear-cytoplasmic RNA and protein fractionation; the RNA levels of *Gapdh*, *Neat1*, *Mir122hg-001/002* and protein levels of GAPDH and PCNA were detected, respectively. b-e, Mice in each group (n=8 per group) were executed at 6h, 12h, 24h, 48h, 96h and 8d after CCl<sub>4</sub> treatment, respectively; RNA levels of *Pcna*, *miR122-3p*, *miR122-5p*, and protein levels of PCNA in liver were detected, and the WB bands were quantified by ImageJ software, and the relative protein level were calculated based on the PCNA/GAPDH ratio. f-k, Mice in each group (n=8 per group) were executed at 2h, 4h and 6h after Dgal/LPS treatment, respectively; the protein levels of PCNA, LC3B

and BAX in liver were detected by WB (f); the RNA levels of *Ki67*, *Pcna*, *miR122-3p*, and *miR122-5p* in liver were detected by qPCR (g/h/j/k); and PCNA levels were also detected by IHC (i). The data were shown as the mean $\pm$ SD for at least triplicate experiments. \*p < 0.05 for vs Control.

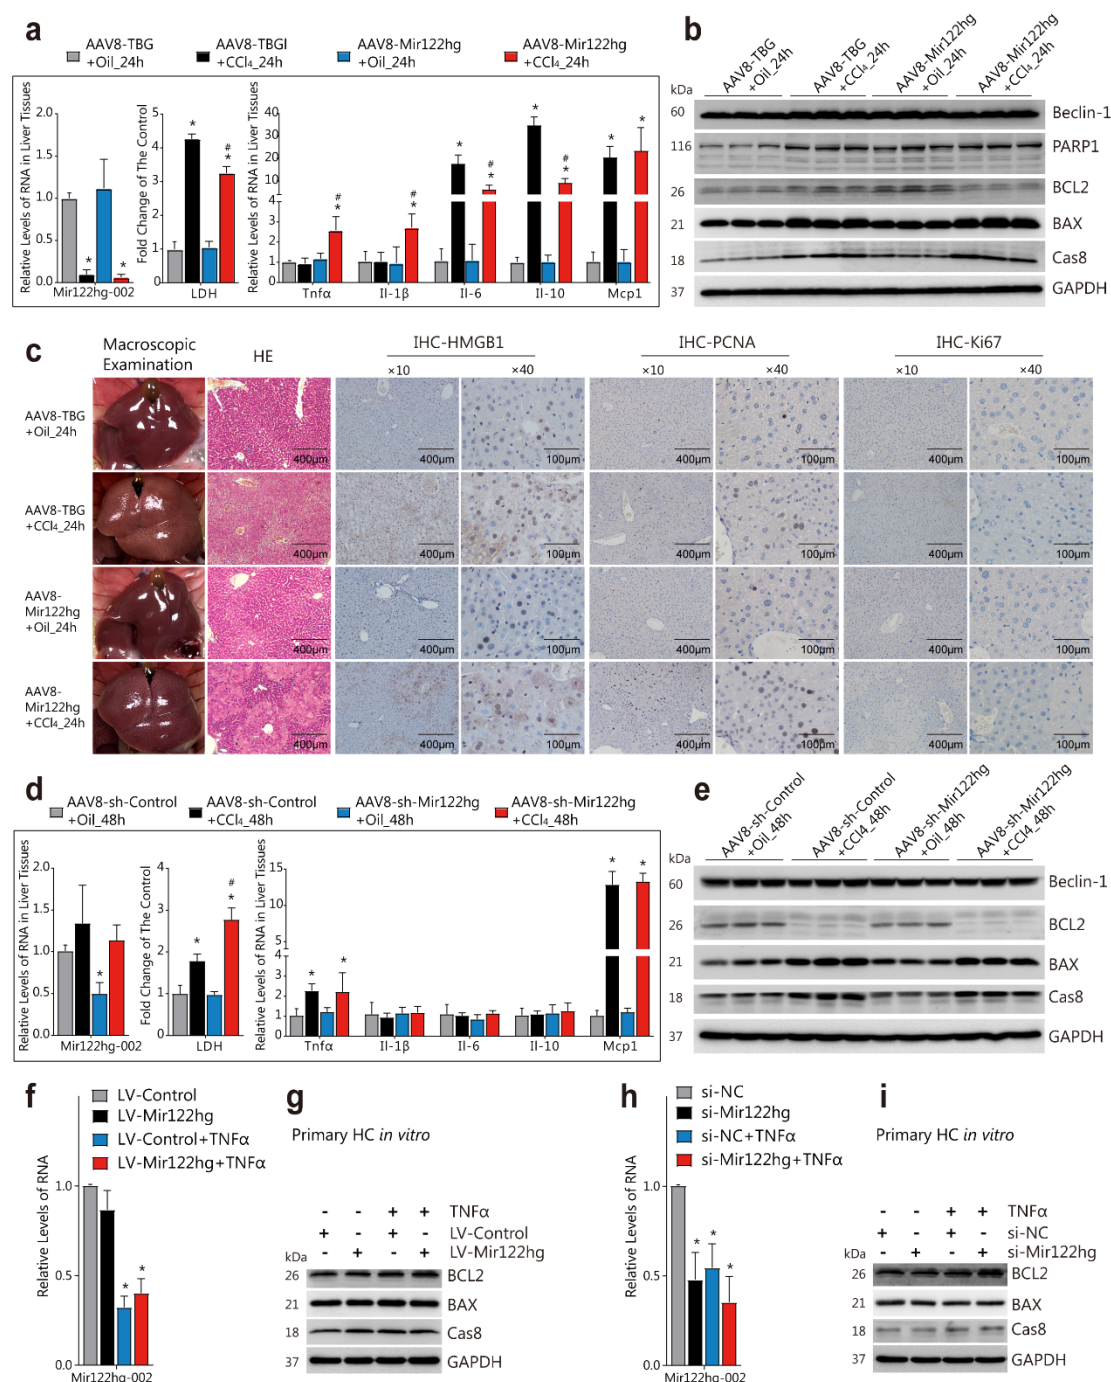

Supplementary Fig. 4: a-e, For the overexpression experiment *in vivo*, mice were injected with AAV8-Mir122hg or control AAV8-TBG for 14d, followed by CCl<sub>4</sub> or Oil treatment for 24h (n=8 per group); and for the silencing experiment *in vivo*, mice were injected by tail vein of AAV8-sh-Mir122hg or AAV8-sh-control for 14d, followed by CCl<sub>4</sub> or Oil treatment for 48h (n=8 per group); the RNA levels of *Mir122hg-002*, *Tnfa*, *Il-1β*, *Il-6*, *Il-10*, *Mcp1* in liver and serum LDH of venous blood were detected (a/d); the levels of autophagy-related Beclin-1, apoptosis-related PARP1, BCL-

2, BAX, Cas8 were detected by WB (b/e); liver macroscopic pictures, HE staining, and IHC detection of HMGB1, PCNA, Ki67 were performed, respectively (c). fi, For the overexpression *in vitro*, primary HCs were treated with lentivirus LV-Mir122hg or LV-Control for 48h, followed by TNF $\alpha$  treatment for 24h; and for the silencing experiment *in vitro*, primary HCs were treated with si-Mir122hg or control si-NC for 36h, followed by TNF $\alpha$  treatment for 24h; the RNA levels of *Mir122hg-002* were detected by qPCR (f/h), and the protein levels of apoptosis-related Cas8, BCL2, BAX in were detected by WB (g/i). The data were shown as the mean $\pm$ SD for at least triplicate experiments. \*p <0.05 for vs Control, #p <0.05 for vs AAV8-TBG+CCl<sub>4</sub>\_24h or AAV8-sh-Control+CCl<sub>4</sub>\_48h.

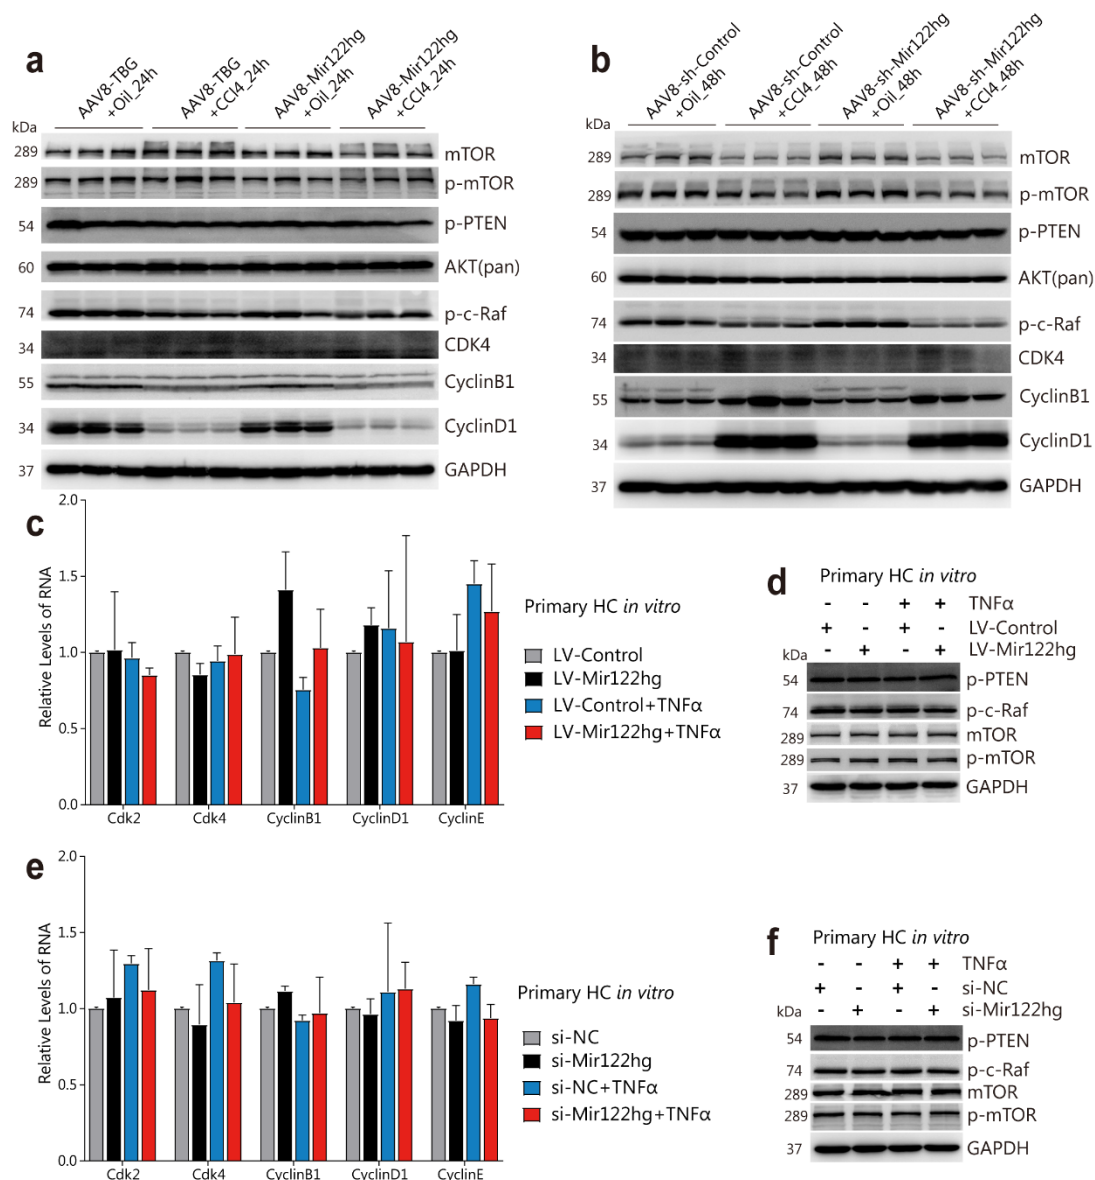

Supplementary Fig. 5: a-b, For the overexpression experiment *in vivo*, mice were injected with AAV8-Mir122hg or control AAV8-TBG for 14d, followed by CCl<sub>4</sub> or Oil treatment for 24h (n=8 per group); and for the silencing experiment *in vivo*, mice were injected by tail vein of AAV8-sh-Mir122hg or AAV8-sh-control for 14d, followed by CCl<sub>4</sub> or Oil treatment for 48h (n=8 per group); the levels of AKT, p-PTEN, p-c-Raf, mTOR, p-mTOR in AKT signaling, and cell-cycle-related CDK4, CyclinB1, CyclinD1 were detected by WB (a/b). c-f, For the overexpression *in vitro*, primary



HCs were treated with lentivirus LV-Mir122hg or LV-Control for 48h, followed by TNF $\alpha$  treatment for 24h; and for the silencing experiment *in vitro*, primary HCs were treated with si-Mir122hg or control si-NC for 36h, followed by TNF $\alpha$  treatment for 24h; the RNA levels of *Cdk2*, *Cdk4*, *CyclinB1*, *CyclinD1*, *CyclinE* were detected by qPCR (c/e), and the protein levels of AKT signaling related p-PTEN, p-c-Raf, mTOR, p-mTOR were detected by WB (d/f). The data were shown as the mean $\pm$ SD for at least triplicate experiments.

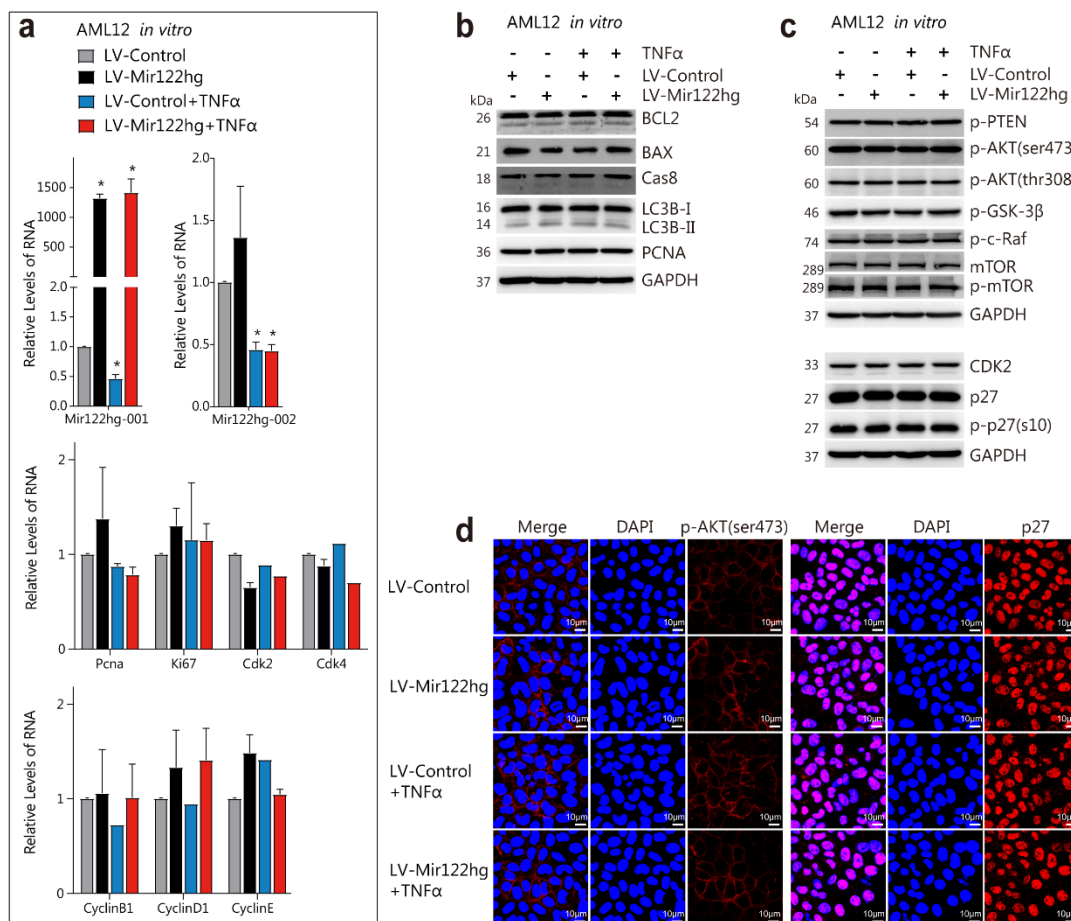

Supplementary Fig. 6: a-d, For the overexpression experiment in AML12, it was treated with lentivirus LV-Mir122hg or LV-Control for 48h, followed by TNF $\alpha$  treatment for 24h; the RNA levels of *Mir122hg-001/002*, *Pcn*, *Ki67*, *Cdk2*, *Cdk4*, *CyclinB1*, *CyclinD1*, *CyclinE* were detected by qPCR (a); protein levels of PCNA, LC3B, Cas8, BAX, BCL-2 (b), and AKT signaling-related p-AKT(ser473), p-AKT(thr308), p-GSK-3 $\beta$ , p-PTEN, p-c-Raf, mTOR, p-mTOR, and downstream p27, p-p27, CDK2 were detected by WB (c); p-AKT(ser473), p27 levels were also detected by confocal (d).

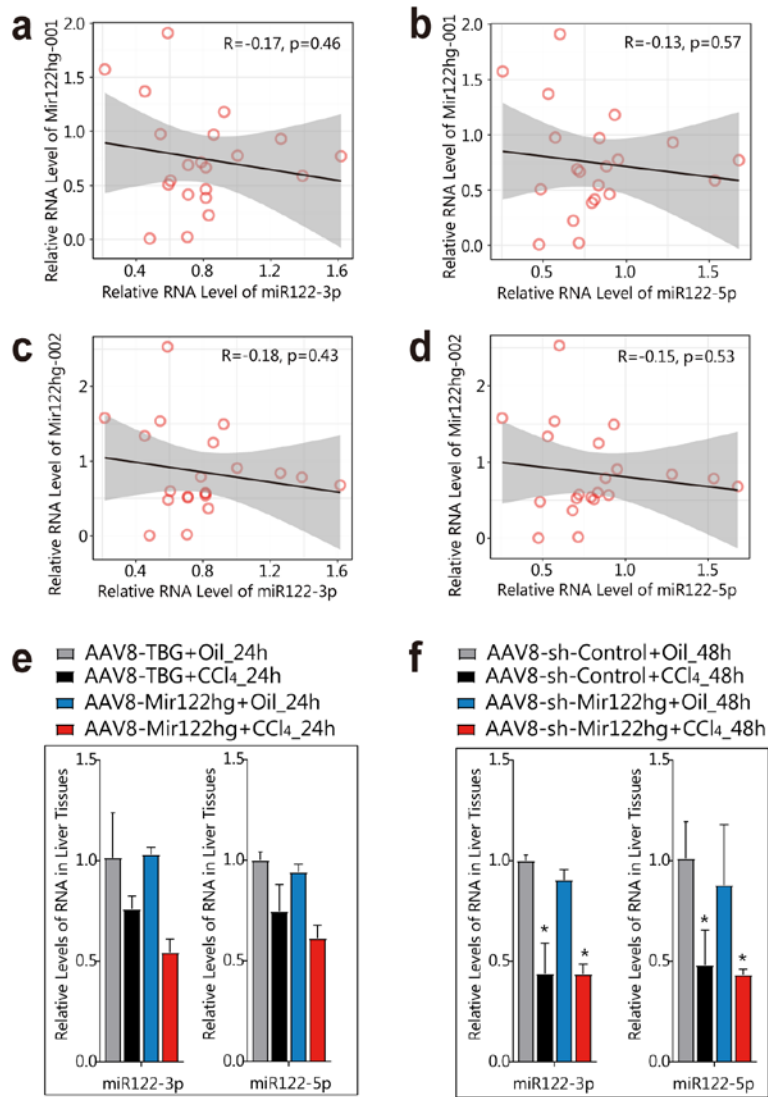

Supplementary Fig. 7: a-d, Mice in each group (n=8 per group) were executed at 6h, 12h, 24h, 48h, 96h and 8d after CCl<sub>4</sub> treatment; correlation analysis between the expression levels of *miR122-3p/5p* and *Mir122hg-001/002* in liver tissues were performed, respectively. e-f, For the overexpression experiment *in vivo*, mice were injected with AAV8-Mir122hg or control AAV8-TBG for 14d, followed by CCl<sub>4</sub> or Oil treatment for 24h (n=8 per group); and for the silencing experiment *in vivo*, mice were injected by tail vein of AAV8-sh-Mir122hg or AAV8-sh-control for 14d, followed by CCl<sub>4</sub> or Oil treatment for 48h (n=8 per group); the RNA levels of *miR122-3p* and *-5p* in liver tissues were detected. The data were shown as the mean $\pm$ SD for at least triplicate experiments. \*p < 0.05 for vs Control.

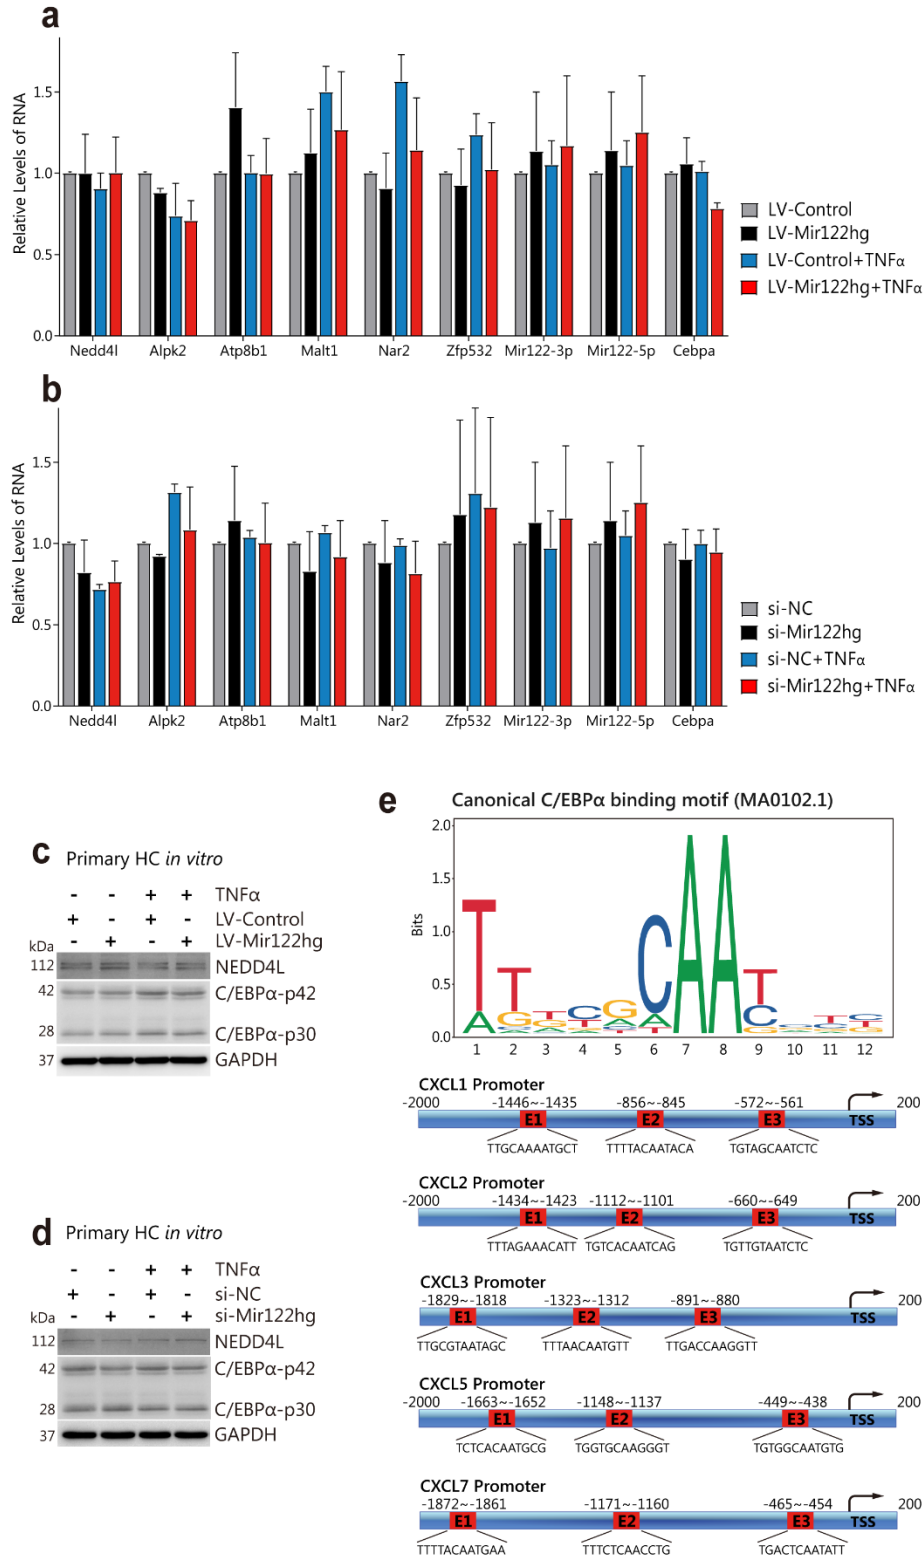

Supplementary Fig. 8: a-d, For the overexpression *in vitro*, primary HCs were treated with lentivirus LV-Mir122hg or LV-Control for 48h, followed by TNF $\alpha$  treatment for 24h; and for the silencing experiment *in vitro*, primary HCs were treated with si-Mir122hg or control si-NC for 36h, followed by TNF $\alpha$  treatment for 24h; the RNA levels of *Nedd4l*, *Alpk2*, *Atp8b1*, *Malt1*, *Nar2*, *Zfp532*, *miR122-3p*, *miR122-5p* and *Cebpa* were detected by qPCR (a/b), and the protein levels of NEDD4L and C/EBP $\alpha$  were detected by WB (c/d). e, The possible binding sites for C/EBP $\alpha$  to the promoter



regions of CXC chemokines *Cxcl1*, *Cxcl2*, *Cxcl3*, *Cxcl5*, and *Cxcl7* were obtained from the JASPAR database. The data were shown as the mean $\pm$ SD for at least triplicate experiments.

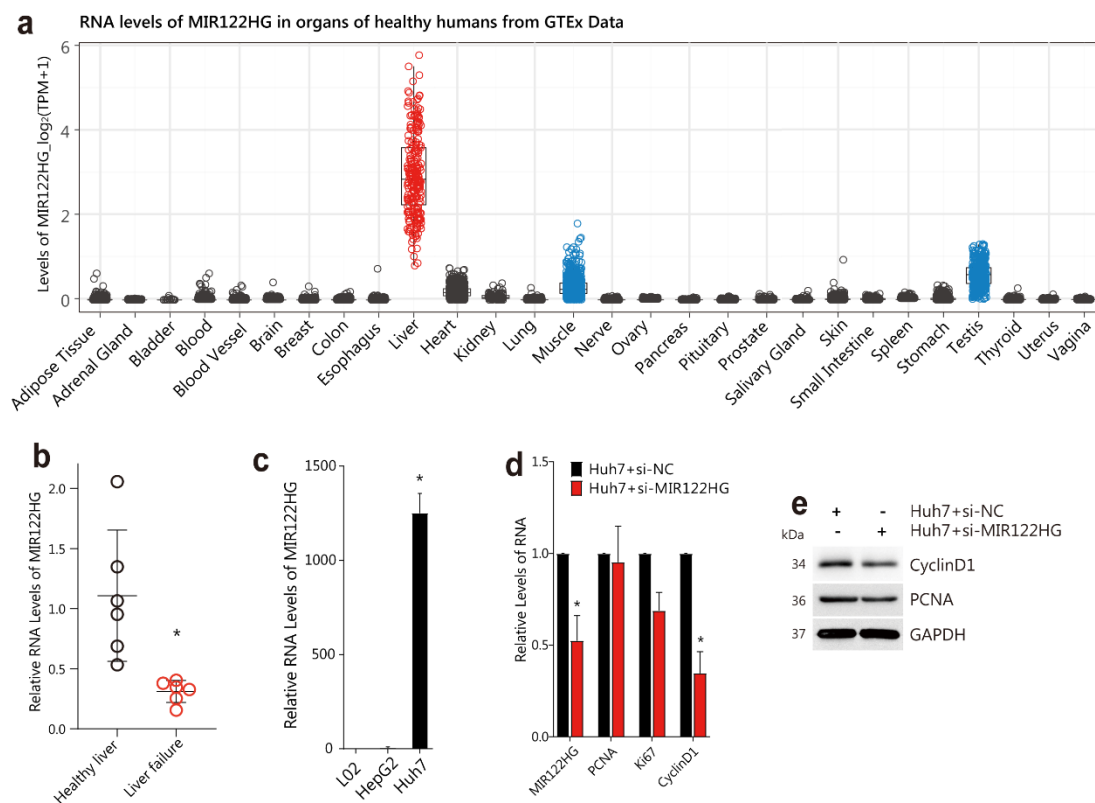

Supplementary Fig. 9: a, RNA-seq data of healthy human from the GTEx database was analyzed to show the levels of MIR122HG in various organs. b, RNA levels of *MIR122HG* in liver tissues from patients with liver failure and healthy liver tissues from patients with hepatic hemangioma were detected by qPCR. c, Cellular RNA levels of *MIR122HG* in L02, HepG2, and Huh7 were detected by qPCR. d-e, For the silencing experiment *in vitro*, Huh7 cells were treated with si-Mir122hg or si-NC for 36h, the RNA levels of *MIR122HG*, *PCNA*, *Ki67*, and *CyclinD1* were detected by qPCR (d), and the protein levels of PCNA, CyclinD1 were detected by WB (e). The data were shown as the mean $\pm$ SD for at least triplicate experiments. \*p < 0.05 for vs Control or L02 or Huh7+si-NC.

## Supplementary Tables

Supplementary Table1: RACE primers for Mir122hg

| Gene Specific Primer (GSP) | Sequence 5' - 3'                         |
|----------------------------|------------------------------------------|
| Forward GSP                | GATTACGCCAAGCTTCGGTGCTCTCACGCACGCAAGGCTG |
| Reverse GSP                | GATTACGCCAAGCTTGGGCTGCCGAAGCTCGGGACTCCTA |

Supplementary Table2: Cloning primers for Mir122hg

| Plasmid                                       | Name                         | Sequence 5' - 3'                                             |
|-----------------------------------------------|------------------------------|--------------------------------------------------------------|
| Lentivirus overexpression plasmid             | oe_Forward_Mir122hg-001      | CTCTCTCCCCAGGGGGATCCACAGATGCTCGG TGCTCTCA                    |
|                                               | oe_Reverse_Mir122hg-001      | GACTCGACTCTAGAGGATCCGCAGTCAGAGTG CCTTATTTCC                  |
| Adeno associated viral overexpression plasmid | oe_AAV8_Forward_Mir122hg-001 | CAAGTAATAAGCTTGGATCCACAGATGCTCGGT GCTCTCA                    |
|                                               | oe_AAV8_Reverse_Mir122hg-001 | TCCAGAGGTTGATTGGATCCGCAGTCAGAGTG CCTTATTTCC                  |
| Adeno associated viral silencing plasmid      | sh_AAV8_Forward_Mir122hg-001 | GATCCGCCTGGTTATCAATAGCATTTC AAGAGA                           |
|                                               | sh_AAV8_Reverse_Mir122hg-001 | ATGCTATTGATAACCAGGCTTTTTTG AATTCAAAAAAGCCTGGTTATCAATAGCATTCT |
|                                               |                              | CTTGAAATGCTATTGATAACCAGGCG                                   |

Supplementary Table3: siRNA sequences

| Name                     | Forward 5' - 3'       | Reverse 5' - 3'        |
|--------------------------|-----------------------|------------------------|
| si-Mir122hg (mouse)      | GCCUGGUUAUCAUAGCAUTT  | AUGCUAUUGAUAAACCAGGCTT |
| si-Cebpa (mouse)         | GGAACAGCUGAGCCGUGAATT | UUCACGGCUCAGCUGUUCCTT  |
| si-MIR122HG (human)      | GAGCUAAGAGACUUCUAGATT | UCUAGAAGUCUCUAGCUCTT   |
| si-NC (negative control) | UUCUCCGAACGUGUCACGUTT | ACGUGACACGUUCGGAGAATT  |

Supplementary Table4: Primers for *in vitro* transcription

|                            | Name                     | Sequence 5' - 3'                         |
|----------------------------|--------------------------|------------------------------------------|
| sense RNA_Mir122hg-001     | Forward_1 (including T7) | TAATACGACTCACTATAGGGCACAGATGCTCGGTGCTCTC |
|                            | Reverse_1                | CAGCGCCTAGGAAGATGTGG                     |
| antisense RNA_Mir122hg-001 | Forward_2 (including T7) | CACAGATGCTCGGTGCTCTC                     |
|                            | Reverse_2                | TAATACGACTCACTATAGGGCAGCGCCTAGGAAGATGTGG |

Supplementary Table5: qPCR primers for analysis of transcript levels

| Gene symbol          | Forward 5' - 3'           | Reverse 5' - 3'         |
|----------------------|---------------------------|-------------------------|
| Mouse Mir122hg-001_1 | GCCTGGCATTAGACAGGGAG      | GGGGCTGTGGACAATTCCAA    |
| Mouse Mir122hg-001_2 | CCTGCATAGAGGTGAAACTGGT    | GGCTCGATGGACTCTCAATCA   |
| Mouse Mir122hg-001_3 | CACTGTCTGGAGGTAAGTGC      | GTGTTGCTCAGGAGCTGTG     |
| Mouse Mir122hg-002   | CTAGGCAATCCGTCCACTCC      | GGAAGGCGTCAGTCAGATGT    |
| Mouse Mir122hg-003   | CACTGTCTGGAGCAAAGTGAC     | CAGTGCTCAGATGCATCAGC    |
| Mouse Mir122hg-004   | CCAACACCAAAGGTTTTAGG      | CTGCAGGAAAAGAGTGTCA     |
| Mouse Mir122hg-005   | GAAATGTCTAGAAATCCCATCC    | CAGGAAAAGAGTGTCTTATTTCC |
| Mouse miR122-3p      | CGCGAAACGCCATTATCACAATAAT | GTGCAGGGTCCGAGGTATTC    |
| Mouse miR122-5p      | CCTGGAGTGTGACAATGGTGTGTTG | GTGCAGGGTCCGAGGTATTC    |
| Mouse snRNA-U6       | AGACAATTGATGCGTGCGATC     | GCTGCAACTGCACTACCAAC    |
| Mouse Nedd4l         | CACGGGTGGTGAGGAATCC       | GCCGAGTCCAAGTTGTGGT     |
| Mouse Alpk2          | CTCCTCCCCAAAGAACCGAC      | CTGCTGGTGGTCAAGGATT     |
| Mouse Atp8b1         | GGATGCAAGCTGTCATGTCC      | TGGGCTGAGTAGCCATTGAA    |
| Mouse Malt1          | GACAGTCAAGATAGCAAGAAGGC   | TGGTCAATTCATACACATCCACC |
| Mouse Nars           | TTCTGGGAACTAATTGGGTGTC    | CCTCGGATCATCATGTGTCTGTT |
| Mouse Zfp532         | TCAGGAAAGTTTACGCCTGCT     | GGTCCTTGATCCCGTGCAT     |
| Mouse Neat1          | GCTCTGGGACCTTCGTGACTCT    | CTGCCTTGGCTTGGAATGTAA   |
| Mouse Gapdh          | GGCATGGACTGTGGTCATGAG     | TGCACCACCAACTGCTTAGC    |
| Mouse Hmgb1          | GGCGAGCATCCTGGCTTATC      | GGCTGCTTGTCTCTGCTG      |
| Mouse Pena           | TTTGAGGCACGCCTGATCC       | GGAGACGTGAGACGAGTCCAT   |
| Mouse Ki67           | CATCCATCAGCCGGAGTCA       | TGTTTCGCAACTTTCGTTTGTG  |
| Mouse Tnfα           | CATCTTCTCAAAATTCGAGTGACAA | TGGGAGTAGACAAGGTACAACCC |
| Mouse Il1-β          | GTCGCTCAGGGTCACAAGAA      | GTGCTGCCTAATGTCCCCTT    |
| Mouse Il-6           | AGTTGCCTTCTTGGGACTGA      | TCCACGATTTCCCAGAGAAC    |
| Mouse Il-10          | GCTCTTACTGACTGGCATGAG     | CGCAGCTCTAGGAGCATGTG    |
| Mouse Mcp1           | CCACAACCACCTCAAGCACT      | AGGCATCACAGTCCGAGTCA    |
| Mouse Cdk2           | CCTGCTTATCAATGCAGAGGG     | GTGCTGGGTACACACTAGGTG   |
| Mouse Cdk4           | ATGGCTGCCACTCGATATGAA     | TCCTCCATTAGGAACTCTCACAC |
| Mouse CyclinB1       | AAGGTGCCTGTGTGTGAACC      | GTCAGCCCCATCATCTGCG     |
| Mouse CyclinD1       | GCGTACCCTGACACCAATCTC     | CTCCTCTTCGCACTTCTGCTC   |
| Mouse CyclinE        | GTGGCTCCGACCTTTCAGTC      | CACAGTCTTGTCAATCTTGGCA  |
| Mouse Cxcr1          | CAAACAATGGCCGAGGCTG       | CAGCAAGCTCAGAAGGGAC     |
| Mouse Cxcr2          | ATGCCCTCTATTCTGCCAGAT     | GTGCTCCGGTTGTATAAGATGAC |
| Mouse Cxcl1          | CTGGGATTACCTCAAGAACATC    | CAGGGTCAAGGCAAGCCTC     |
| Mouse Cxcl2          | CCAACCACCAGGCTACAGG       | GCGTCACACTCAAGCTCTG     |
| Mouse Cxcl3          | GAAAGGAGGAAGCCCCTCAC      | ACACATCCAGACACCGTTGG    |
| Mouse Cxcl5          | CACTCGCAGTGGAAGAAGCG      | CGTGGGTGGAGAGAATCAGC    |
| Mouse Cxcl7          | ATTGCAACGGAAATCGCCTG      | ATGTTGCAGAGGTTGCTTGG    |
| Mouse Cxcl8          | GACAGAGATACCGCCACGTT      | CAGTGTCTTGCCCTGGCTC     |
| Mouse Cebpa          | CAAGAACAGCAACGAGTACCG     | GTCAGTGGTCAACTCCAGCAC   |

|                |                        |                        |
|----------------|------------------------|------------------------|
| Human MIR122HG | GTGAAATGGGTCCAAGCCCT   | TCGCTGACCATCCACAAGAG   |
| Human Ki67     | GCCTGCTCGACCCTACAGA    | GCTTGTCAACTGCGGTTGC    |
| Human PCNA     | GGTTACTGAGGGCGAGAAGC   | GACCGGCTGAGACTTGCGTA   |
| Human CyclinD1 | GTGGCCTCTAAGATGAAGGAGA | GGAAGTGTTCAATGAAATCGTG |
| Human GAPDH    | ACCCAGAAGACTGTGGATGG   | TTCAGCTCAGGGATGACCTT   |

Supplementary Table6: Primers for Mouse ChIP qRT-PCR

| Locus                 | Forward 5' - 3'        | Reverse 5' - 3'        |
|-----------------------|------------------------|------------------------|
| Cxcl1(pro-1485,-1375) | GTAGAGTACCACGTCTCTTCC  | GCATTTGCTTCACAGAGCTG   |
| Cxcl1(pro-941,-768)   | GCTAGTTCTAGGTAACCCTG   | GTCTAACAGCAAAGGGCTAT   |
| Cxcl1(pro-640,-527)   | GATGCTTCAGGAACCACACC   | CTGTCAAGGTTAGGTCCCTG   |
| Cxcl2(pro-1459,-1376) | CCTTAGCATTTATACAGTGAGT | GAAATGCACCCAAATAACTG   |
| Cxcl2(pro-1138,-1039) | CTAGAACTGAGGGCTACAATAG | GTATACATCCATTCTTGTCCCA |
| Cxcl2(pro-688,-565)   | CCAGAATTTACAGAGGAAGT   | CATATCCTTCTACCCGACTTG  |
| Cxcl3(pro-1888,-1709) | GATCTCTGTAAATCTGAGGC   | GTCATCACACTCAGTTTGTG   |
| Cxcl3(pro-1412,-1288) | GCAAAAGTGTACCTTCCAG    | GTGTTACAGGCATTACAACA   |
| Cxcl3(pro-942,-829)   | CCTTCTTAGCCTTAGTGTCT   | GCATCTGAAACTCCTGATTG   |
| Cxcl5(pro-1719,-1620) | CATTTGTTGAGTCAAGTGTG   | GTCTAGTTGAAGGAAGTTGG   |
| Cxcl5(pro-1186,-1111) | CAGAACGGATGCTATCTTGC   | CTCATCCGTGGGACTTATCT   |
| Cxcl5(pro-474,-334)   | CTAGAGAAGCTTGTGAGCAG   | CAAACACTATTGCTGACACC   |
| Cxcl7(pro-1977,-1801) | GCTAAGAGACTTTTGCTATCC  | CTACCATTGTATAAACTCCTTC |
| Cxcl7(pro-1219,-1137) | GTGACTCTGTGAATGGGTTG   | CAAGCTGGCTTCAAACCTCAC  |
| Cxcl7(pro-516,-416)   | CAGAGAGAAGCCCATAAACT   | CTGCTGGGTATCAGAATTTG   |
| Gapdh intron          | ATCCTGTAGGCCAGGTGATG   | AGGCTCAAGGGCTTTTAAGG   |

Supplementary Table7: Clinical information of the 12 patients with hepatic hemangioma and liver failure.

| Group                                                                                                        | Age(years) | Gender | ALT(U/L) | AST(U/L) | TB(umol/L) | LDH(U/L) | ALB(g/L) |
|--------------------------------------------------------------------------------------------------------------|------------|--------|----------|----------|------------|----------|----------|
| Healthy liver tissues<br>(from patients with<br>hepatic hemangioma)                                          | 48         | Male   | 12.1     | 15.1     | 13.1       | 130      | 40.2     |
|                                                                                                              | 35         | Female | 16.2     | 15.5     | 12.4       | 125      | 41.3     |
|                                                                                                              | 55         | Female | 16.9     | 15.9     | 7.6        | 134      | 38.5     |
|                                                                                                              | 36         | Male   | 16.1     | 27.2     | 5.3        | 210      | 39.2     |
|                                                                                                              | 45         | Male   | 23.3     | 19.4     | 8.2        | 207      | 40.5     |
|                                                                                                              | 63         | Male   | 19.4     | 19.1     | 7.7        | 185      | 41.2     |
| Liver failure tissues<br>(from patients with<br>acute liver failure or<br>acute-on-chronic<br>liver failure) | 54         | Male   | 506.1    | 246.6    | 369.1      | 250      | 30.9     |
|                                                                                                              | 44         | Male   | 366.5    | 274.3    | 12.9       | 156      | 47.6     |
|                                                                                                              | 56         | Male   | 349.8    | 925.7    | 162.7      | 563      | 27.6     |
|                                                                                                              | 50         | Male   | 148.3    | 374.4    | 201.5      | 366      | 36.2     |
|                                                                                                              | 52         | Male   | 105.3    | 226.9    | 185.7      | 211      | 30       |
|                                                                                                              | 34         | Female | 3649.6   | 2404.7   | 67.1       | 262.5    | 36.1     |
